# Supplementary material for: Conformational and coordination properties of a peptide containing the novel α,α-bis(2-pyridyl)glycine amino acidElectronic supplementary information (ESI) available: Figs. 1S, 2S. See http://www.rsc.org/suppdata/dt/b2/b209199b/
Source: Royal Society of Chemistry journal article supplement (doi:10.1039/b209199b), 2003-02-05
Supplement: b209199b.doc [file b209199b.doc]

## **Conformational and coordination properties of a peptide containing ,-di(2-pyridyl)glycine**

**Luigi Di Costanzo, Silvano Geremia, Lucio Randaccio, Tomoyuki Ichino, Ryoji Yanagihara, Takashi Yamada, Daniela Marasco, Angela Lombardi and Vincenzo Pavone**

SUPPLEMENTARY MATERIAL

**Legends to Figures**

Fig. 1S. Geometry for the 2Dpy residue in **1**. Angles and distances are in ° and Å, respectively.

Fig. 2S. Crystal packing of Z-Aib1-Dpy2-Aib3-OMe, viewed along the *z*axis. Intermolecular H-bonds are indicated by dashed lines.

Fig. 1S

b

a

# Fig. 2S
